# Supplementary material for: Clinicopathologic features and abnormal signaling pathways in plasmablastic lymphoma: a multicenter study in China
Source: Springer Nature journal article supplement (doi:10.1186/s12916-022-02683-9), 2022-12-15

Table S1. RT-PCR primers

| GENE    | Sequence                       |
|---------|--------------------------------|
| SDC1-F  | 5'-CTGCCGCAAATTGTGGCTAC-3'     |
| SDC1-R  | 5'-TGAGCCGGAGAAGTTGTCAGA-3'    |
| CHRM3-F | 5'-CACAATAACAGTACAACCTCGCC-3'  |
| CHRM3-R | 5'-GCCAGGATGCCCGTTAAGAAA-3'    |
| HTR2C-F | 5'-CTAATTGGCCTATTGGTTTGGCA-3'  |
| HTR2C-R | 5'-CCACCATCGGAGGTATTGAAAA-3'   |
| CD22-F  | 5'-GCACCCTGAAACCCTCTACG-3'     |
| CD22-R  | 5'-ATCAAACCTTCGAGGTGTTCTTGT-3' |
| CD72-F  | 5'-ATCTGAGGTTTGTGAAGGCTCC-3'   |
| CD72-R  | 5'-AACATTCTCGTAGGTGATTTCCC-3'  |
| CD19-F  | 5'-CCCAAGGGGCCTAAGTCATTG-3'    |
| CD19-R  | 5'-AACAGACCCGTCTCCATTACC-3'    |
| GAPDH-F | 5'-TGCACCACCAACTGCTTAGC-3'     |
| GAPDH-R | 5'-GGCATGGACTGTGGTCATGAG-3'    |

Table S2. Clinicopathologic characteristics of PBL patients in our study

| Variable                  | Total N (%)  |
|---------------------------|--------------|
| Patients                  | 102          |
| Age (years)               |              |
| >60                       | 39(38.2)     |
| ≤60                       | 63(61.8)     |
| Median (years)            | 55           |
| Sex                       |              |
| Male                      | 68(66.7)     |
| Female                    | 34(33.3)     |
| Site(s) of involvement    |              |
| Lymph involvement         | 24(23.5)     |
| Gastro-intestinal tractus | 20(19.6)     |
| Oral cavity               | 16(15.7)     |
| bone                      | 12(11.8)     |
| skin                      | 7(6.9)       |
| Ear, nose, throat site    | 6(5.9)       |
| lung                      | 5(4.9)       |
| Maxillary sinus           | 3(2.9)       |
| peritoneum                | 3(2.9)       |
| liver                     | 2(2.0)       |
| adrenal gland             | 2(1.9)       |
| uterus                    | 1(1.0)       |
| Soft tissue               | 1(1.0)       |
| Immunohistochemistry      |              |
| CD38                      | 49/55 (89.1) |
| CD138                     | 54/79 (68.3) |
| MUM1                      | 77/86 (89.5) |
| EBER                      | 15/36        |
| Ki67 (median)             | 80.0%        |

Table S3. Clinicopathologic characteristics of PBL patients and DLBCL patients for RNA sequencing in our study

| Variable         | DLBCL | PBL | <i>P</i> value |
|------------------|-------|-----|----------------|
| Patients         | 11    | 6   |                |
| Age (years)      |       |     | >0.99          |
| >60              | 5     | 3   |                |
| ≤60              | 6     | 3   |                |
| Sex              |       |     | >0.99          |
| Male             | 8     | 5   |                |
| Female           | 3     | 1   |                |
| Primary site(s)  |       |     | >0.99          |
| Lymph node       | 1     | 1   |                |
| Extranodal sites | 10    | 5   |                |
| Ann Arbor stage  |       |     | >0.99          |
| I or II          | 7     | 4   |                |
| III or IV        | 4     | 2   |                |

Figure S1

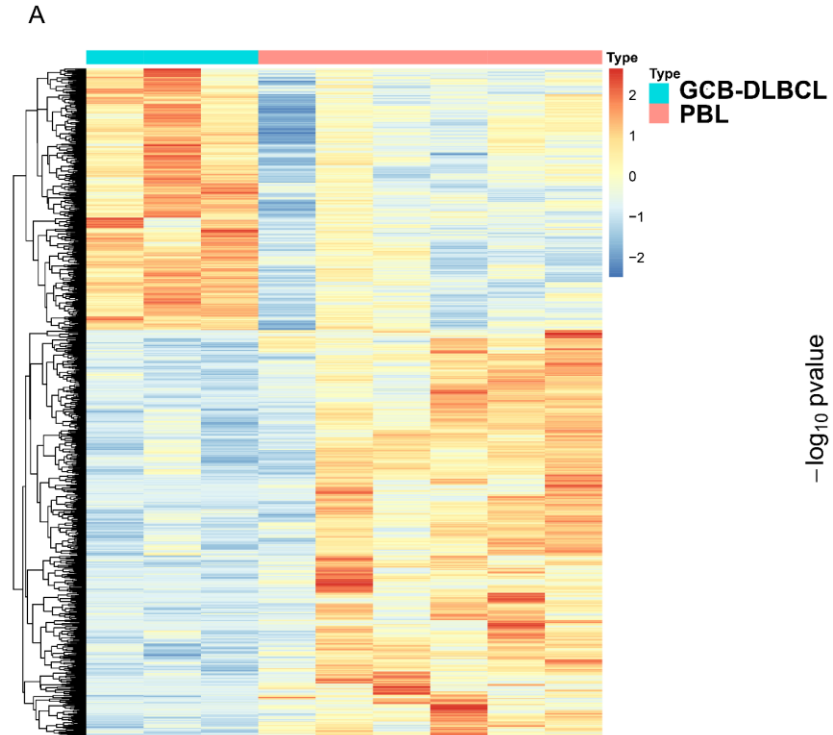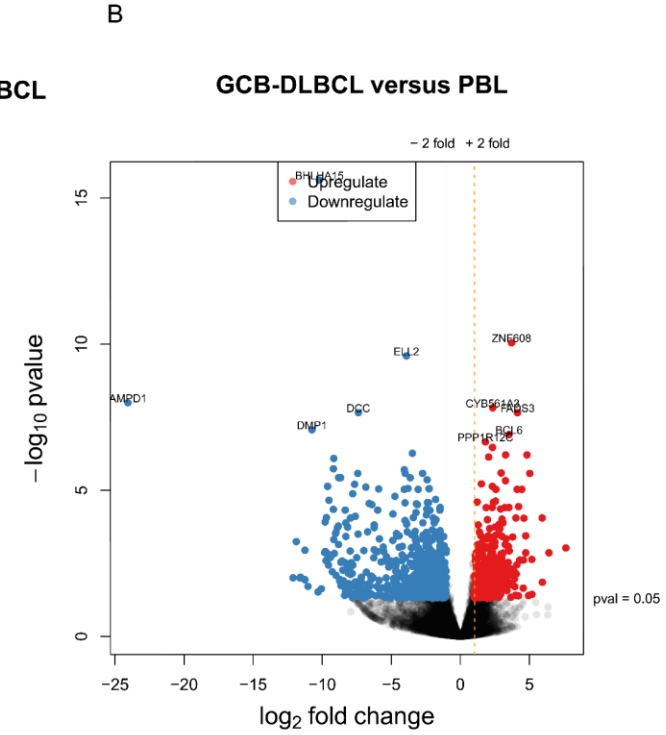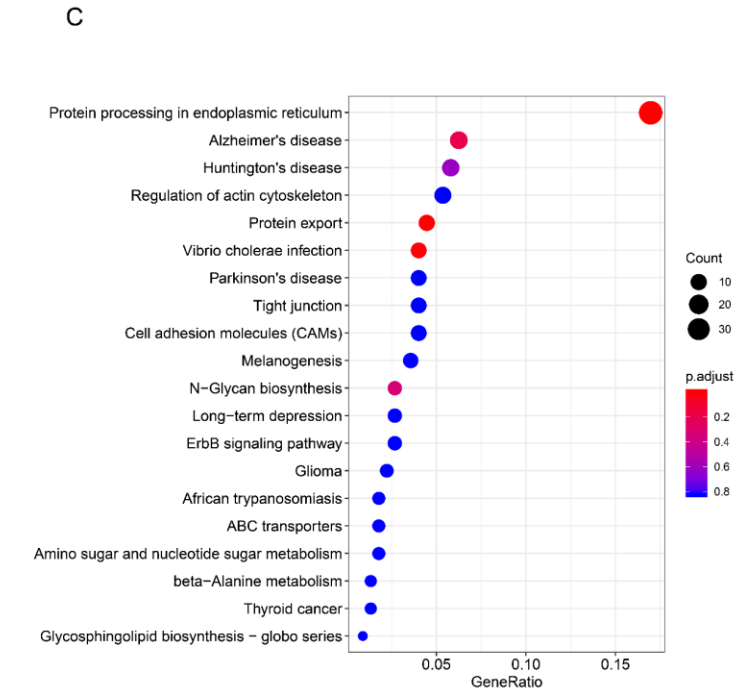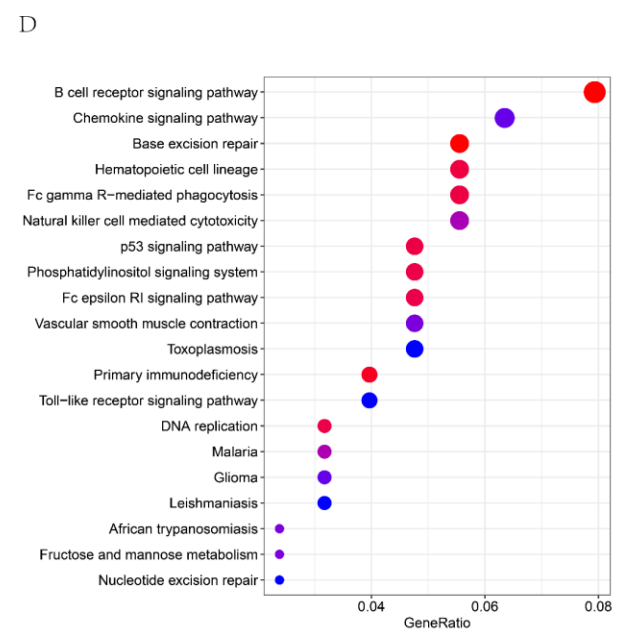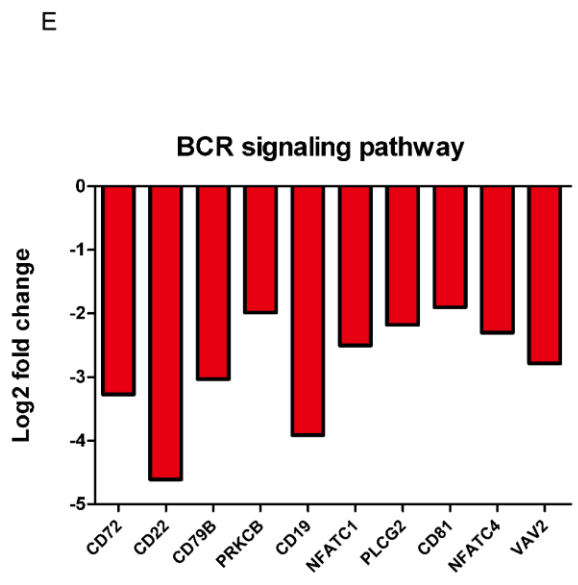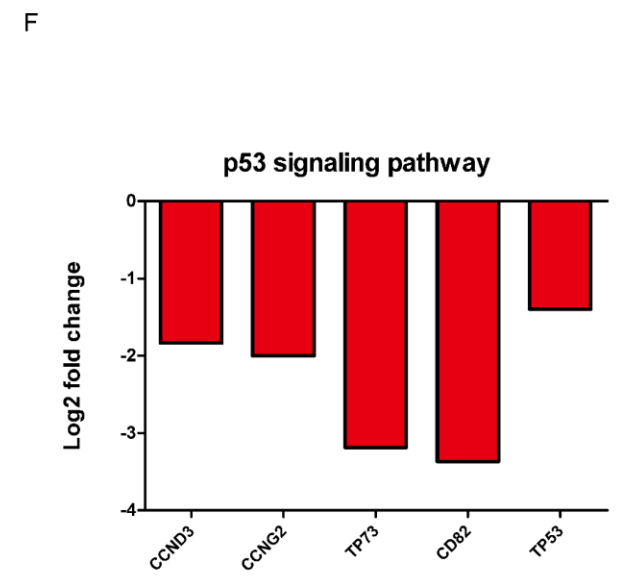

Figure S2

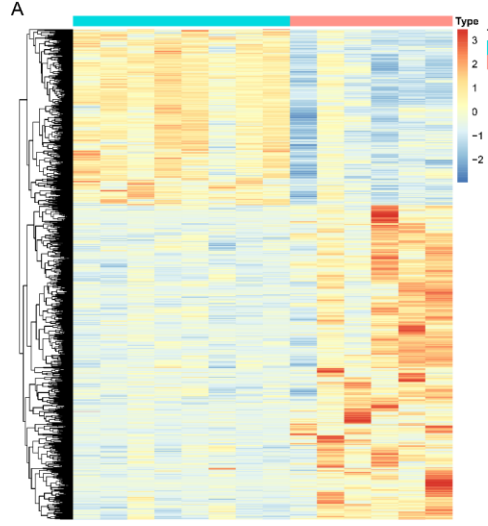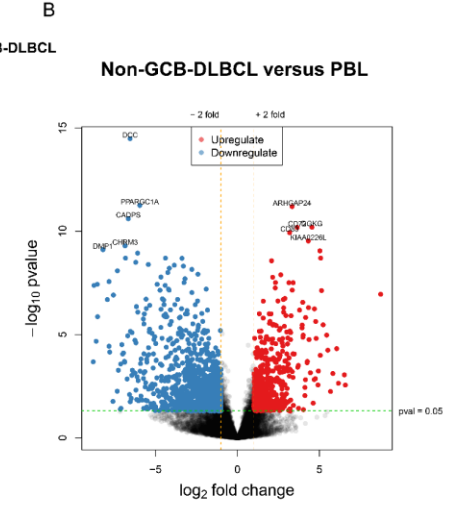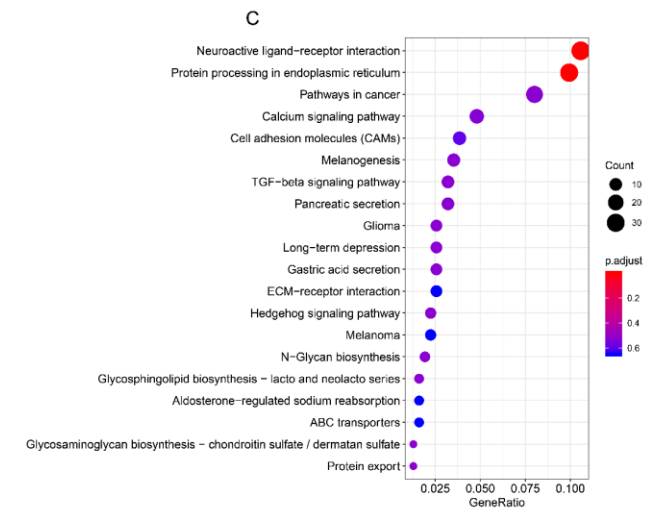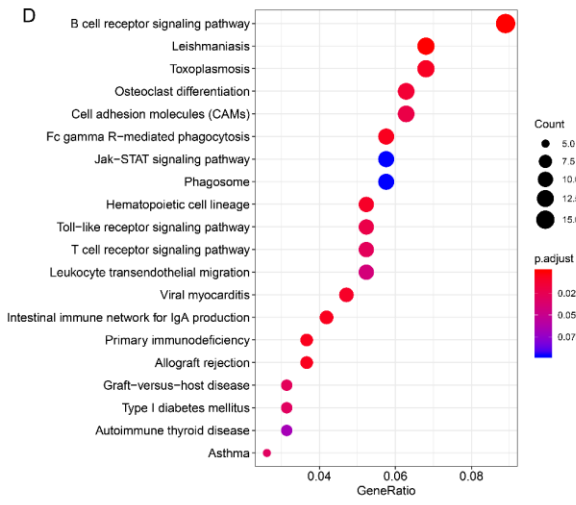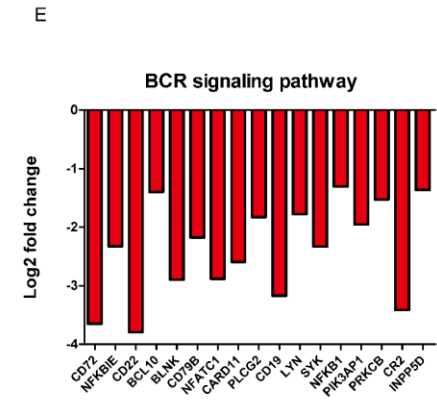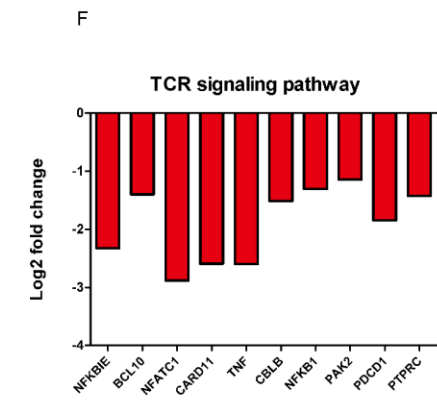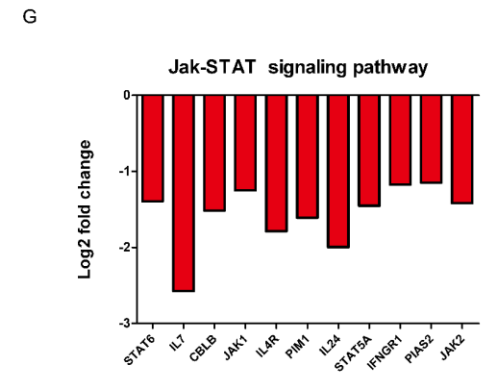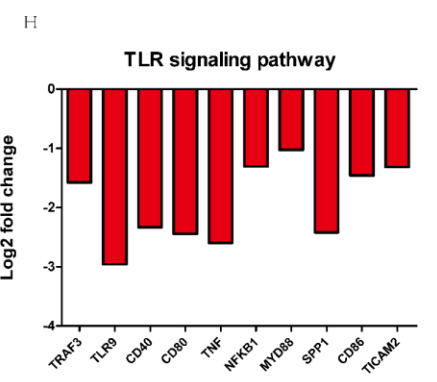

Supplement: MOESM1 [file 23830954]
